**Title: Deep learning-based auto-segmentation of swallowing and  
chewing structures**

**Authors:** Aditi Iyer<sup>1</sup>, Maria Thor<sup>1</sup>, Rabia Haq<sup>1</sup>, Joseph O. Deasy<sup>1</sup>,  
Aditya P. Apte<sup>1</sup>

*<sup>1</sup>Department of Medical Physics, Memorial Sloan Kettering Cancer  
Center, New York, USA*

1 **Abstract**

2 **Purpose**

3 Delineating the swallowing and chewing structures in Head and Neck (H&N) CT scans is  
4 necessary for radiotherapy treatment (RT) planning to reduce the incidence of radiation-induced  
5 dysphagia, trismus, and speech dysfunction. Automating this process would decrease the manual  
6 input required and yield reproducible segmentations, but generating accurate segmentations is  
7 challenging due to the complex morphology of swallowing and chewing structures and limited  
8 soft tissue contrast in CT images.

9 **Methods**

10 We trained deep learning models using 194 H&N CT scans from our institution to segment the  
11 masseters (left and right), medial pterygoids (left and right), larynx, and pharyngeal constrictor  
12 muscle using DeepLabV3+ with the resnet-101 backbone. Models were trained in a sequential  
13 manner to guide the localization of each structure group based on prior segmentations.  
14 Additionally, an ensemble of models was developed using contextual information from three  
15 different views (axial, coronal, and sagittal), for robustness to occasional failures of the individual  
16 models. Output probability maps were averaged, and voxels were assigned labels corresponding  
17 to the class with the highest combined probability.

18 **Results**

19 The median dice similarity coefficients (DSC) computed on a hold-out set of 24 CT scans were  
20  $0.87 \pm 0.02$  for the masseters,  $0.80 \pm 0.03$  for the medial pterygoids,  $0.81 \pm 0.04$  for the larynx, and  
21  $0.69 \pm 0.07$  for the constrictor muscle. The corresponding 95<sup>th</sup> percentile Hausdorff distances were

22 0.32±0.08cm (masseters), 0.42±0.2cm (medial pterygoids), 0.53±0.3cm (larynx), and  
23 0.36±0.15cm (constrictor muscle). Dose-volume histogram (DVH) metrics previously found to  
24 correlate with each toxicity were extracted from manual and auto-generated contours and  
25 compared between the two sets of contours to assess clinical utility. Differences in DVH metrics  
26 were not found to be statistically significant ( $p>0.05$ ) for any of the structures. Further, inter-  
27 observer variability in contouring was studied in 10 CT scans. Automated segmentations were  
28 found to agree better with each of the observers as compared to inter-observer agreement,  
29 measured in terms of DSC.

### 30 **Conclusions**

31 We developed deep learning-based auto-segmentation models for swallowing and chewing  
32 structures in CT. The resulting segmentations can be included in treatment planning to limit  
33 complications following RT for H&N cancer. The segmentation models developed in this work  
34 are distributed for research use through the open-source platform CERR, accessible at  
35 <https://github.com/cerr/CEERR>.

36

37

38

39

40

41

42

43

## 44 **1. INTRODUCTION**

45 Delineating organs at risk (OAR) is central in radiotherapy (RT) treatment planning to limit normal  
46 tissue complications following RT. Manual delineation is time-consuming, subjective, and prone  
47 to errors due to factors such as organ complexity and level of experience [1]. Therefore, there has  
48 been a great deal of interest in automating this process to generate accurate and reproducible  
49 segmentations in a time-efficient manner.

50 In head and neck (H&N) cancer treatment, isolating the larynx and pharyngeal constrictor muscle  
51 is of particular interest to limit speech dysfunction and dysphagia, respectively, following RT [2]  
52 [3]. The masseters and medial pterygoids have also been identified as critical structures in limiting  
53 radiation-induced trismus [4]. However, delineating these structures is challenging due to their  
54 complex morphology and the low soft tissue contrast in CT images.

55 Few semi-automatic and automatic methods have been previously developed to segment OARs in  
56 the H&N. Conventional multi-atlas-based auto-segmentation (MABAS) methods involve  
57 propagating and combining manually-segmented OARs from a curated library of CT scans through  
58 image registration as in [5] and [6]. Other approaches offer strategies to further refine MABAS  
59 using organ-specific intensity [7] and texture [8] features or shape representation models [9] [10].  
60 However, MABAS is sensitive to inter-subject anatomical variations as well as image artifacts,  
61 and image registration is computationally intensive, requiring several minutes even with highly  
62 efficient implementations [11].

63 Convolutional neural networks (CNNs) have recently been applied successfully to various medical  
64 image segmentation tasks. Ibragimov et al. [12] trained 13 CNNs, applied in sliding-window

65 fashion to segment H&N OARs including the larynx and pharynx, which were further refined  
66 using Markov Random Field (MRF)-based post-processing. In [13], Ward van Rooij et al.  
67 employed the popular 3D U-net [14] architecture to segment H&N OARs including the pharyngeal  
68 constrictor muscle. Zhu et al. [11] extended the U-Net model by incorporating squeeze-and  
69 excitation (SE) residual blocks and a modified loss function to improve segmentation of smaller  
70 structures such as the chiasm and optic nerves. In [15], Men et al. segmented nasopharyngeal tumor  
71 volumes in H&N CT using a modified version of the VGG-16 [16] architecture, replacing fully-  
72 connected layers with fully-convolutional layers and introducing improved decoder networks to  
73 rebuild high-resolution feature maps. Tong et al [17] trained a fully convolutional neural net  
74 (FCNN), incorporating prior information by training a shape representation model to regularize  
75 shape characteristics of 9 H&N OARs. The FocusNet [18] developed by Gao et al. utilizes multiple  
76 CNNs to segment H&N OARs including the larynx, first segmenting large structures, then  
77 segmenting smaller structures with specifically designed sub-networks.

78 In this work, we present a fully automatic method to segment swallowing and chewing structures  
79 and examine its suitability for clinical use. To the best of our knowledge, this is the first [35] deep  
80 learning-based method for segmenting the chewing structures in CT images. We propose a novel  
81 framework in which DeepLabV3+ segmentation models are trained sequentially to guide the  
82 localization of each structure group based on previously-segmented structures. Model ensembles  
83 are created using three orthogonal views (axial, sagittal, and coronal) in 2.5D and shown to  
84 improve segmentation accuracy of H&N OARs compared to models trained on a single-view.

## 85 **2. MATERIALS AND METHODS**

### 86 **2.1 Dataset**

87 CT scans of 243 H&N cancer patients from our institution were retrospectively collected under  
88 IRB 16-142 and accessed under IRB 16-1488 to develop the auto-segmentation methods in this  
89 work. The dataset was randomly partitioned into training (80%), validation (10%), and testing  
90 (10%) sets. The validation set (10%) was used to estimate model performance while tuning  
91 hyperparameters, and the testing set (10%) was used for unbiased evaluation of the final model.  
92 Representative CT images showing considerable variation in head pose, shape, and appearance  
93 around the structures of interest, including slices with dental artifacts due to dental implants, were  
94 included in the dataset. Additional data characteristics are listed in Table 1. Manual segmentations  
95 of the masseters (left, right), medial pterygoids (left, right), larynx, and constrictor muscle,  
96 generated using MSKCC’s in-house treatment planning system, served as the reference standard.  
97 Reference contours of the masseters and medial pterygoids were available in 60% of the scans,  
98 and the constrictor muscle in 97% of the scans (larynx was provided in all scans).

99 **Table 1.** Summary of data characteristics for axial images

| <b>Attribute</b>      | <b>Median</b> | <b>Min</b> | <b>Max</b> | <b>5<sup>th</sup> percentile</b> | <b>95<sup>th</sup> percentile</b> |
|-----------------------|---------------|------------|------------|----------------------------------|-----------------------------------|
| Number of slices      | 80            | 48         | 279        | 65                               | 103                               |
| In-plane spacing (mm) | 0.78          | 0.51       | 1.37       | 0.61                             | 1.17                              |
| Slice thickness (mm)  | 3.00          | 1.25       | 6.00       | 2.50                             | 3.27                              |

100

## 101 **2.2 CNN segmentation model**

102 The DeepLabV3+ CNN [19] was selected due to its impressive performance on the PASCAL VOC  
103 2012 and Cityscapes datasets. Moreover, it has previously been applied successfully to medical  
104 image segmentation tasks, e.g., by Elguindi et al. [26] to segment the prostate in MR images and

105 by Haq et al. [27] to segment cardio-pulmonary substructures in CT images. This architecture  
106 offers the advantage of an encoder network that can capture contextual information at different  
107 scales using multiple dilated convolution layers applied in parallel at different rates and a decoder  
108 network capable of effectively recovering object boundaries.

109 Here, training was performed using ResNet-101 [20] as the backbone of the encoder network. A  
110 publicly-distributed implementation [21] of DeepLabV3+ using the Pytorch [33] framework was  
111 utilized, and a soft-max layer was appended to obtain voxel-wise probabilities. On training a single  
112 multi-class model to segment all the structures of interest, it was observed that the imbalance in  
113 class labels due to large differences in OAR sizes led to poor performance on smaller structures.  
114 Augmenting the loss function based on class frequencies did not produce significant improvement,  
115 as previously observed in [18]. Consequently, three separate models were developed- one to  
116 segment the chewing structures and one each for the larynx and the constrictor muscle. A  
117 sequential segmentation strategy (figure 1) was utilized in which each segmented OAR was used  
118 to constrain the location of subsequently segmented OARs. Additionally, an ensemble of three  
119 models was developed per OAR group using 2D axial, sagittal, and coronal slices. As compared  
120 to 3D convolutional neural networks (CNNs) which are highly memory-intensive, training in 2D  
121 enabled us to employ a more complex CNN while still providing contextual information and  
122 increased redundancy from the three different orientations.

123 A high-performance cluster with four NVIDIA GeForce GTX 1080Ti GPUs with 11GB of  
124 memory each was used in training. Batch-normalization was applied using mini-batches of 8  
125 images, resized to 320 x 320 voxels. Input images were standardized by scaling the intensities to  
126 [0,1] and normalizing to zero-mean and unit-variance. Data augmentation was performed through  
127 image scaling, cropping, and rotation. Input channels were populated using three consecutive slices

128 (axial, sagittal, and coronal, respectively, for the three models), and the cross-entropy loss was  
129 employed in training. Data preprocessing and export to HDF5 [28] format was performed using  
130 the Computational Environment for Radiological Research (CERR) [23]. Details of the individual  
131 models are presented in the following sections, and Table 2 summarizes the hyperparameters used.

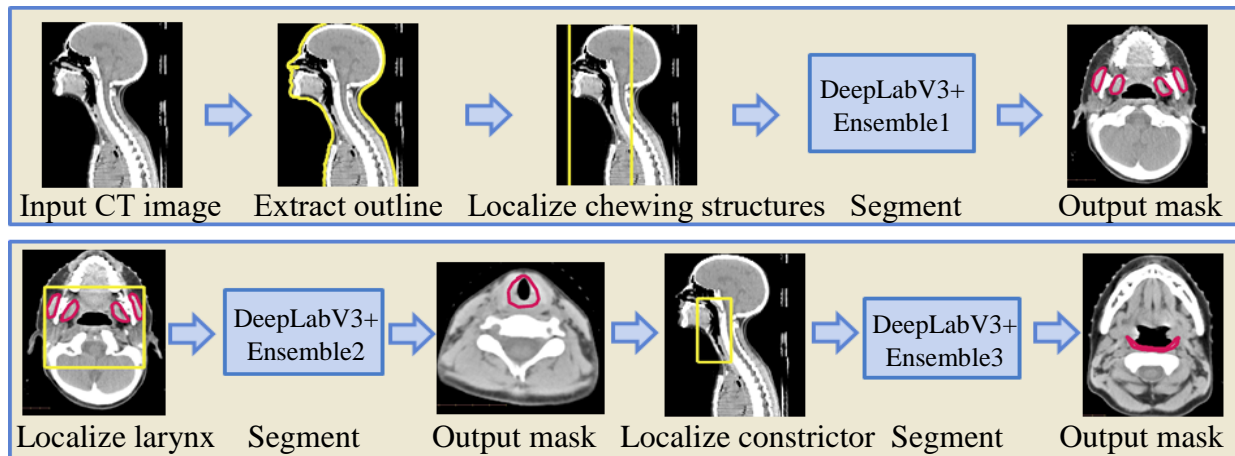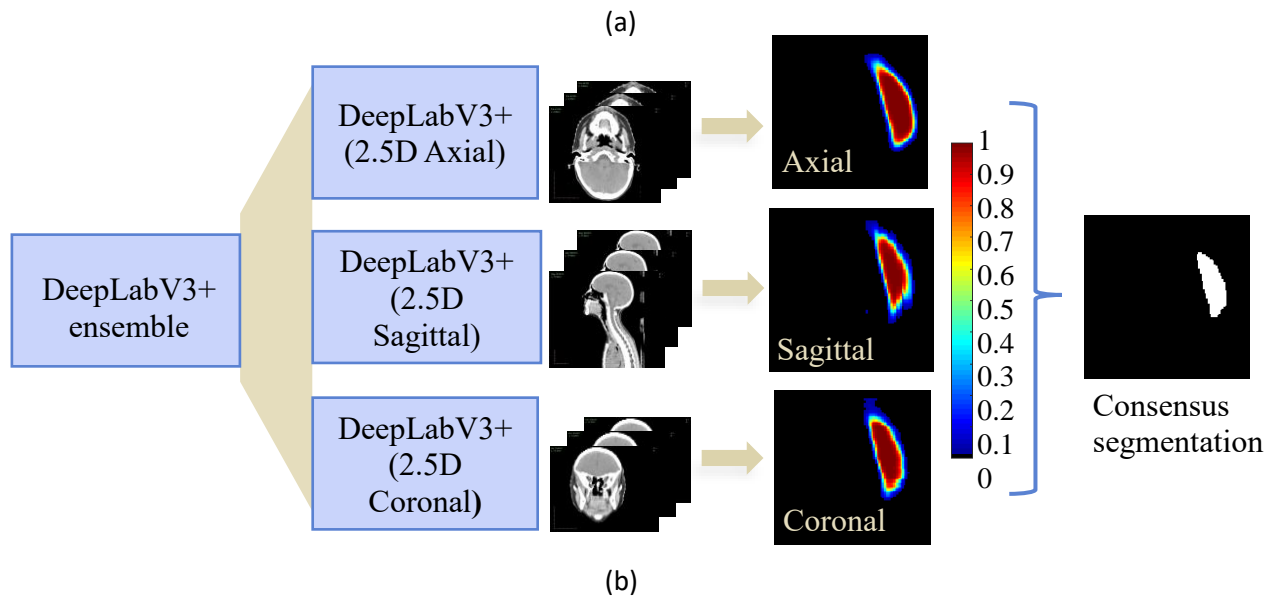

132 **Figure 1.** (a) Sequential framework for segmenting chewing and swallowing structures using deep  
133 learning, in which each segmented OAR group is used to improve localization of subsequently  
134 segmented OARs. (b) Example showing consensus segmentation of left masseter using ensemble  
135 model trained on 3 orthogonal views (axial, sagittal, and coronal).



### 136 2.3 Chewing structures

137 A multi-label model was trained to segment the left and right masseters and medial pterygoids.  
138 H&N CT scans were automatically cropped around the patient's outline prior to training. The  
139 couch was first detected using the Hough transform and masked out. This was followed by  
140 intensity-based thresholding and morphological post-processing to extract the patient's outline. A  
141 bounding box was generated around the outline and its posterior extent was limited by 25%. 2D  
142 axial, sagittal, and coronal images and corresponding masks of the chewing structures were  
143 extracted within these extents for training.

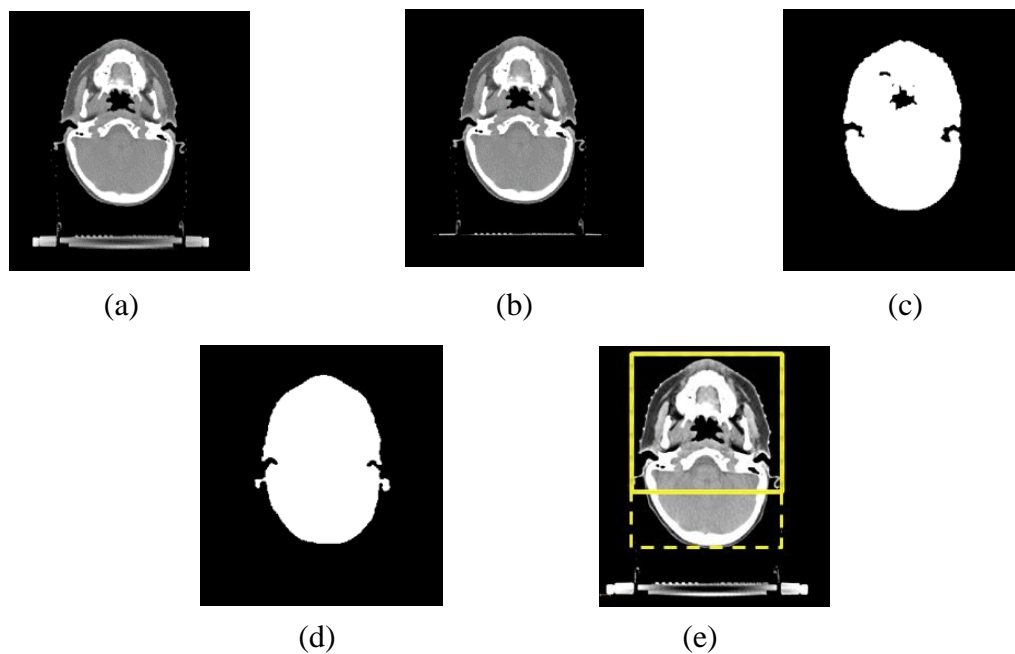

144 **Figure 2.** Illustration of method to localize chewing structures in axial H&N CT scans. (a) Input  
145 CT image (b) Hough transform-based couch segmentation (c) Intensity thresholding to extract  
146 patient outline (d) Morphological post-processing (e) Bounding box with reduced posterior extent.  
147  
148 Model weights were optimized using Stochastic Gradient Descent (SGD) with hyperparameters  
149 listed in Table 2 and learning rate was decayed following the polynomial scheduling policy. An

150 early stopping strategy was employed to avoid overfitting if there was no improvement in the  
151 validation loss.

## 152 **2.4 Swallowing structures**

### 153 **2.4.1 Larynx**

154 CT scans were cropped further, with the anterior, left, right, and superior limits defined by the  
155 corresponding extents of the previously segmented chewing structures, as shown in figure 3. 2D  
156 axial, sagittal and coronal images and corresponding masks of the larynx were extracted within the  
157 resulting bounding box and optimization was performed using SGD.

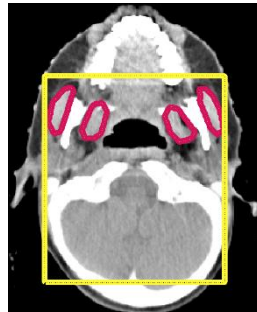

158  
159 **Figure 3.** Bounding box (yellow) for localization of larynx using previously segmented chewing  
160 structures (red).

### 161 **2.4.2 Constrictor muscle**

162 To localize the constrictor muscle, CT scans were cropped with the anterior, left, right, and  
163 superior limits defined by the corresponding extents of the chewing structures. The posterior and  
164 inferior limits were defined by corresponding extents of the larynx, with sufficient padding. 2D  
165 axial, sagittal, and coronal images and corresponding masks of the constrictor muscle were

166 extracted within the resulting bounding box, shown in figure 4. Optimization was performed using  
167 adaptive moment estimation (Adam) [22].

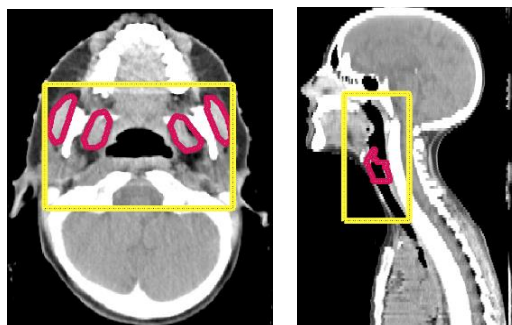

168  
169 **Figure 4.** Bounding box (yellow) for localization of constrictor muscle using previously  
170 segmented chewing structures and larynx (red).

171 For each of the above OARs, probability maps returned by the three models (axial, sagittal, and  
172 coronal) were averaged and voxels were assigned to the class with the highest resulting probability  
173 to produce stable consensus segmentations, robust to occasional failures of the individual models.  
174 The segmentation masks were further post-processed to remove isolated voxels by discarding all  
175 but the largest connected component. Morphological processing was performed to fill holes and  
176 obtain smooth contours.

177 **Table 2.** Summary of hyperparameters for training.

| Model | Structure(s)                                                                 | Learning rate   | Optimizer | Momentum | Weight Decay |
|-------|------------------------------------------------------------------------------|-----------------|-----------|----------|--------------|
| 1     | MML <sup>a</sup> , MMR <sup>b</sup> ,<br>PML <sup>c</sup> , PMR <sup>d</sup> | Axial: 0.002    | SGD       | 0.9      | 0.0001       |
|       |                                                                              | Sagittal: 0.003 |           |          |              |
|       |                                                                              | Coronal: 0.002  |           |          |              |

|   |                 |                              |      |     |        |
|---|-----------------|------------------------------|------|-----|--------|
| 2 | Larynx          | Axial: 0.0003                | SGD  | 0.9 | 0.0002 |
|   |                 | Sagittal: 0.0003             |      |     |        |
|   |                 | Coronal: 0.0003              |      |     |        |
| 3 | CM <sup>e</sup> | Axial: 1x10 <sup>-6</sup>    | Adam | 0.9 | 0.0001 |
|   |                 | Sagittal: 8x10 <sup>-7</sup> |      |     |        |
|   |                 | Coronal : 2x10 <sup>-6</sup> |      |     |        |

<sup>a</sup> Masseter (left); <sup>b</sup> masseter (right); <sup>c</sup> medial pterygoid (left); <sup>d</sup> medial pterygoid (right); <sup>e</sup> constrictor muscle.

## 178 3. RESULTS

### 179 3.1 Comparison to reference standard

180 The performance of the proposed method was evaluated on the test set of 24 H&N cancer patients  
 181 by comparing the results against existing manually delineated segmentations. The Dice Similarity  
 182 Coefficient (DSC) was used to assess the degree of overlap between manual (A) and automated  
 183 (B) segmentations, computed as:

$$184 \quad DSC = 2 \frac{|A \cap B|}{|A| + |B|}$$

185 Additionally, the 95<sup>th</sup> percentile of the Hausdorff distance (HD<sub>95</sub>), i.e., maximum distance between  
 186 boundary points of A and B, was computed to capture the impact of a few sizeable segmentation  
 187 errors on the overall segmentation quality. Both DSC and HD<sub>95</sub> were measured for the individual

188 models (axial, sagittal, coronal) as well as the ensemble to investigate the benefits of a multi-view  
 189 ensemble.

190 Examples of segmentations resulting from our algorithm are presented in figure 5 for qualitative  
 191 assessment. Box plots of DSC and HD<sub>95</sub> are presented in figure 6.

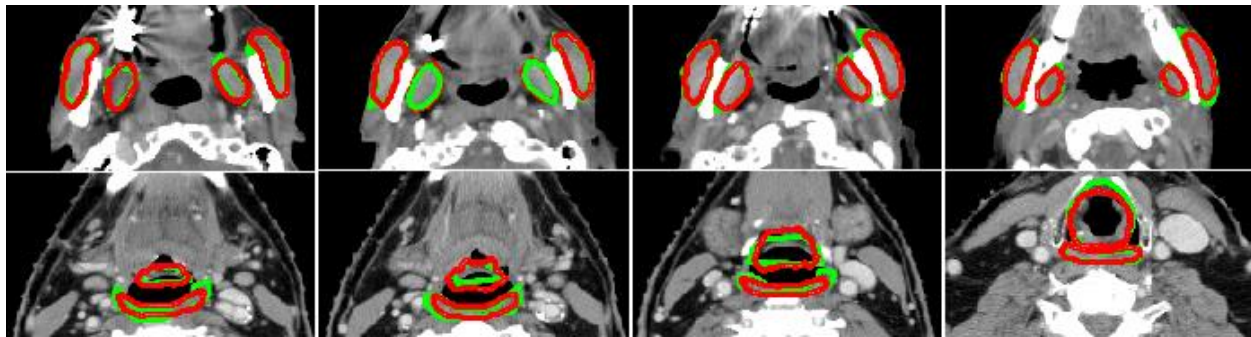

192  
 193 **Figure 5.** Auto-segmentation results for chewing structures (row-1) and swallowing structures  
 194 (row-2), shown in four axial cross-sections. Manual reference segmentations are depicted in green  
 195 and deep-learning-based auto-segmentations in red.

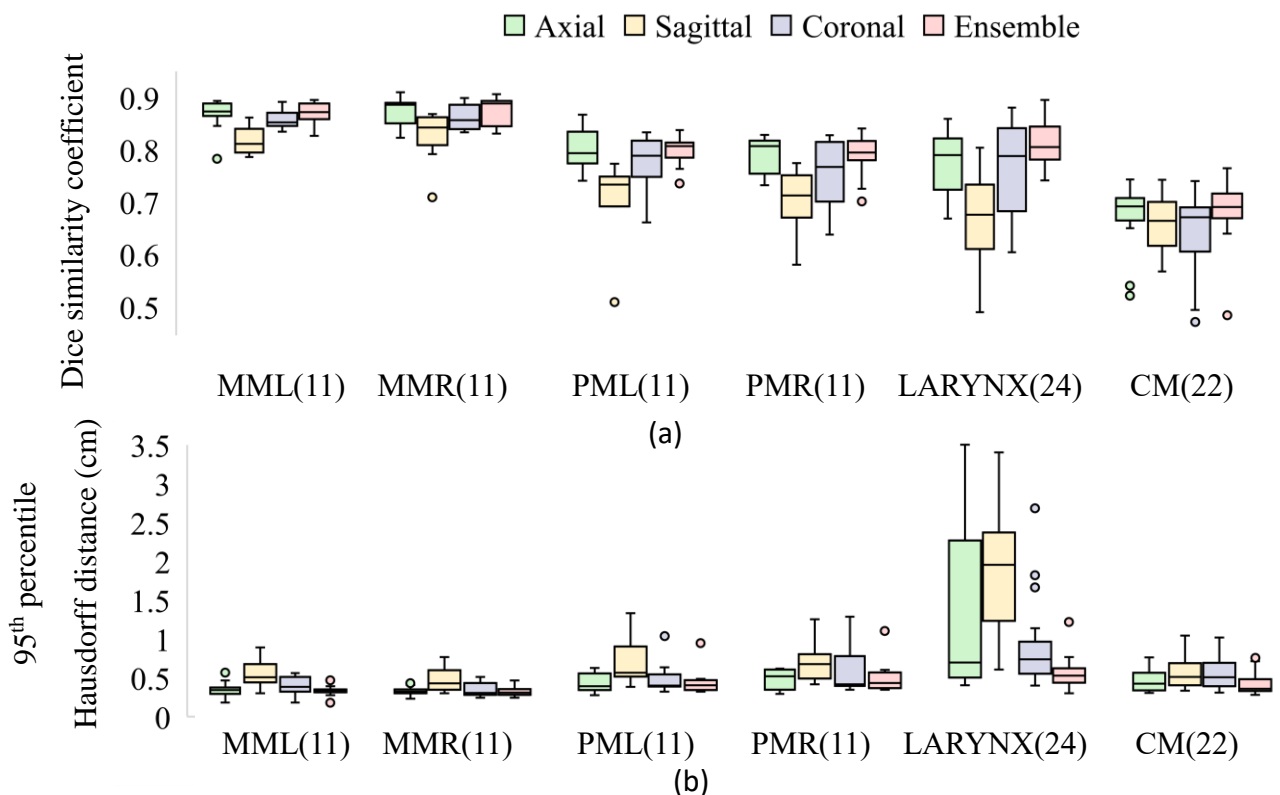

196 **Figure 6.** Performance of deep learning models (axial, sagittal, coronal, and ensemble) compared  
 197 to manual reference segmentations in terms of (a) DSC and (b) HD<sub>95</sub>. Of the 24 test patients, the  
 198 number with manual contours available for comparison is noted in parentheses. *MML*, *MMR*:  
 199 *masseters (left and right)*, *PML*, *PMR*: *medial pterygoids (left and right)*, *CM* : *constrictor muscle*.

200 Differences in mean dose, previously identified [29-30] as a possible factor in radiation-induced  
 201 complications were also computed between deep learning-based and manual contours, and the  
 202 Wilcoxon signed-rank test was applied to investigate potential statistical disparities (Table 3).  
 203 Differences in mean dose were not found to be statistically significant for all tested structures at  
 204 significance level 5%.

205 **Table 3.** Comparison of mean doses extracted using manual and auto-generated contours. Median,  
 206 first and third quartiles of percentage differences are presented.

| Structure                           | Metric                                | Difference (%)      | p-value | No. test patients |
|-------------------------------------|---------------------------------------|---------------------|---------|-------------------|
| MML <sup>b</sup> U MMR <sup>c</sup> | Ipsilateral <sup>a</sup><br>mean dose | -0.01 (-1.20, 1.32) | 1.00    | 11                |
| PML <sup>d</sup> U PMR <sup>e</sup> | Ipsilateral <sup>a</sup><br>mean dose | 0.53 (-0.77, 1.11)  | 0.70    | 11                |
| Larynx                              | Mean dose                             | 0.38 (-2.02, 6.59)  | 0.33    | 24                |
| CM <sup>f</sup>                     | Mean dose                             | 0.15 (-0.49, 1.28)  | 0.29    | 22                |

<sup>a</sup>Ipsilaterality for the paired structures was decided based upon the side with the highest dose. <sup>b</sup>

Masseter (left); <sup>c</sup> masseter (right); <sup>d</sup> medial pterygoid (left); <sup>e</sup> medial pterygoid (right); <sup>f</sup>  
 constrictor muscle.

### 207 3.2 Variability of reference standards

208 The manual reference segmentations came from various sources: the larynx was delineated for  
209 treatment planning by multiple observers with variation in level of expertise; the constrictors and  
210 chewing structures were each delineated post-treatment by one of two radiation oncology residents  
211 for studying dysphagia and trismus, respectively [29] [30]. Regardless of origin, these contours  
212 are referred to as observer-1. A randomly selected subset of 10 CT scans from the testing dataset  
213 were then re-segmented by a medical physicist (observer-2) to provide a second reference  
214 standard. The agreement between the independent observers was measured in terms of DSC and  
215 compared to agreement of each observer with the deep learning-based contours (figure 7).  
216 Automated segmentations showed better agreement with each observer as compared to the inter-  
217 observer agreement.

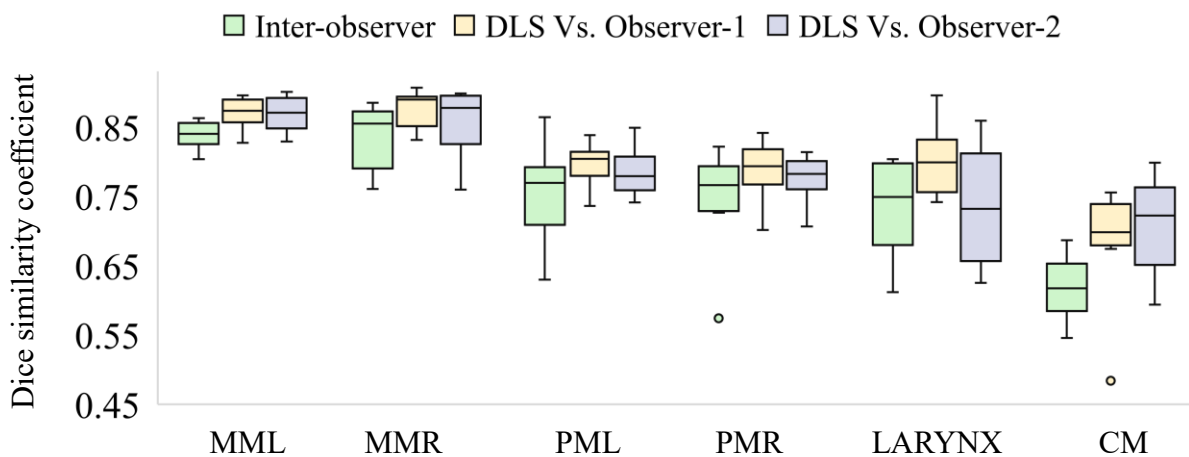

218  
219 **Figure 7.** Comparing agreement of deep learning-based segmentations (DLS) with independent  
220 observers vs. inter-observer agreement. *MML, MMR: Masseters (left and right), PML, PMR:*  
221 *medial pterygoids (left and right), CM (constrictor muscle)*

### 222 3.3 Comparison to previously reported methods

223 We compared the performance of our method with H&N OARs segmentation models from the  
224 published literature. These included state-of-the-art CNN models such as the 3D Unet [13],

225 FocusNet [18], a H&N OAR-focused CNN [12], commercial atlas-based segmentation tool SPICE  
226 [5] and other atlas-based methods [24,25]. The mean DSCs for the different methods are  
227 summarized in Table 4. The performance of our segmentation models matched or exceeded  
228 previously presented methods. However, it should be noted that these results were reported on  
229 different datasets and do not represent a direct comparison performed on our testing dataset.

### 230 **3.4 Distribution of trained models**

231 The segmentation models developed in this work are publicly distributed as a part of CERR's  
232 library of model implementations [31]. Model dependencies were encapsulated using Singularity  
233 [34] containers, enabling deployment on a variety of scientific computing architectures and aiding  
234 in portability and reproducibility. This also facilitates further analysis through integration with  
235 CERR's radiomics toolbox [32] and dosimetric models [31]. CERR can be downloaded from  
236 <https://github.com/cerr/CERR>. The list of currently available segmentation containers and  
237 corresponding links for download are available at [https://github.com/cerr/CERR/wiki/Auto-](https://github.com/cerr/CERR/wiki/Auto-Segmentation-models)  
238 [Segmentation-models](https://github.com/cerr/CERR/wiki/Auto-Segmentation-models). It should be noted that the segmentation models are distributed strictly for  
239 research use. Clinical or commercial use is prohibited. CERR and containerized model  
240 implementations have not been approved by the U.S. Food and Drug Administration (FDA).

241 **Table 4.** DSC (mean  $\pm$  std. deviation) for swallowing and chewing structures using the proposed  
242 method (column-1) and results from previously published methods.

243



| Structure   | Proposed    | van Rooij et al. [13] (2019) <sup>1</sup> | Gao et al. [18] (2019) <sup>1</sup> | Ibragimov et al. [12] (2017) <sup>1</sup> | Tao et al. [5] (2015) <sup>2</sup> | Thomson et al. [24] (2015) <sup>2</sup> | Han et al. [25] (2008) <sup>2</sup> |
|-------------|-------------|-------------------------------------------|-------------------------------------|-------------------------------------------|------------------------------------|-----------------------------------------|-------------------------------------|
| Masseters   | 0.87 ± 0.02 | -                                         | -                                   | -                                         | -                                  | -                                       | 0.83                                |
| Pterygoids  | 0.80 ± 0.03 | -                                         | -                                   | -                                         | -                                  | -                                       | 0.83                                |
| Larynx      | 0.81 ± 0.04 | 0.78 ± 0.05                               | 0.66±0.29                           | 0.86 ± 0.04                               | 0.73 ± 0.04                        | 0.58                                    | -                                   |
| Constrictor | 0.68 ± 0.07 | 0.68 ± 0.09                               | -                                   | 0.69 ± 0.06                               | 0.65 ± 0.06                        | 0.50                                    | -                                   |

244 <sup>1</sup>Deep learning based <sup>2</sup> atlas based.

#### 245 4. DISCUSSION

246 We trained three distinct model ensembles to segment structures of different sizes and constrained  
 247 the location of each structure group based on the extents of previously identified structures. This  
 248 sequential localization framework was able to handle imbalance in class labels due to differences  
 249 in the sizes of the OARs. Additionally, we used an ensemble of models trained on three different  
 250 image orientations to capture important contextual information and provide redundancy in case of  
 251 failures of the individual models. The performance of the of the multi-view ensemble in terms of  
 252 DSC either matched or out-performed the individual models and showed lower variance across all  
 253 structures, as evidenced by tighter bounds in the box plots (figure 6). Further, the multi-view  
 254 consensus reduced the worst-case segmentation errors (as captured by HD<sub>95</sub>) across all the  
 255 structures. This suggests that employing a multi-view ensemble may help produce more stable  
 256 segmentations than single-view models

257 Of the structures considered, the pharyngeal constrictor muscle was most challenging to segment  
 258 due to its morphological complexity, high anatomical variability, and low soft tissue contrast. This

259 was reflected in our analysis of manual segmentations by different observers. The lowest inter-  
260 observer agreement was observed in delineating the constrictor. In some cases, segmentation was  
261 further complicated by tumor infiltration around the periphery. For the larynx, standardizing the  
262 reference segmentations (generated by multiple observers with varying levels of experience) prior  
263 to training could potentially yield better results. We also observed a few spurious and  
264 discontinuous detections of the larynx when using models trained only on axial or sagittal images.  
265 This was mitigated by generating a consensus segmentation using information from all 3 views  
266 (e.g. figure 8). Finally, the deep learning models for all structures were found to generalize well as  
267 the auto-generated results showed good agreement with delineations by a new (unseen) observer.  
268 We further investigated the potential for clinical application of the trained models by comparing  
269 mean doses extracted from manual and automated segmentations. No statistical differences were  
270 observed at the 5% significance level.

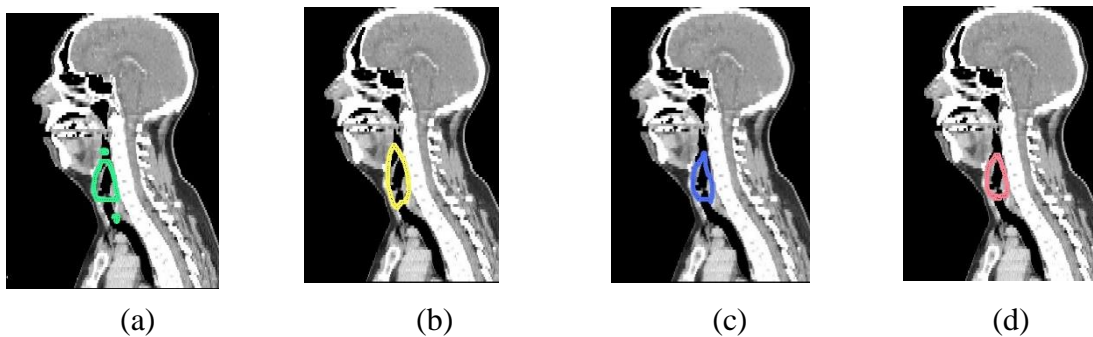

271 **Figure 8.** Sagittal cross sections showing auto-segmented larynx using (a) axial only (b) sagittal  
272 only (c) coronal only and (d) ensemble models.

## 273 5. CONCLUSIONS

274 We developed a fully-automatic, accurate, and time-efficient method to segment swallowing and  
275 chewing structures in CT images and demonstrated its potential for clinical use. The proposed

276 method introduces a novel framework for sequential localization and segmentation to handle  
277 imbalances in OAR sizes. Additionally, the potential advantage of a multi-view ensemble over a  
278 single-view model was investigated. As hypothesized, the ensemble models were found to yield  
279 more stable segmentations across all structures. This ensemble approach could be applied to  
280 improve segmentation quality in other sites as well. The trained models are publicly distributed  
281 for research use through the open-source platform CERR using Singularity containers.

## 282 REFERENCES

- 283 1. Harari PM, Song S, Tomé WA. Emphasizing conformal avoidance versus target definition  
284 for IMRT planning in head-and-neck cancer. *International journal of radiation oncology,*  
285 *biology, physics.* <https://www.ncbi.nlm.nih.gov/pmc/articles/PMC2905233/>.
- 286 2. Choi M, Refaat T, Lester MS, Bacchus I, Rademaker AW, Mittal BB. Development of a  
287 standardized method for contouring the larynx and its substructures. *Radiation oncology*  
288 *(London, England).* <https://www.ncbi.nlm.nih.gov/pmc/articles/PMC4266916/>.
- 289 3. Levendag PC, Teguh DN, Voet P, et al. Dysphagia disorders in patients with cancer of the  
290 oropharynx are significantly affected by the radiation therapy dose to the superior and middle  
291 constrictor muscle: A dose-effect relationship. *Radiotherapy and Oncology.* 2007;85(1):64-  
292 73. doi:10.1016/j.radonc.2007.07.009
- 293 4. Kraaijenga SA, Hamming-Vrieze O, Verheijen S, et al. Radiation dose to the masseter and  
294 medial pterygoid muscle in relation to trismus after chemoradiotherapy for advanced head  
295 and neck cancer. *Head & Neck.* 2019;41(5):1387-1394. doi:10.1002/hed.25573
- 296 5. Tao C-J, Yi J-L, Chen N-Y, et al. Multi-subject atlas-based auto-segmentation reduces  
297 interobserver variation and improves dosimetric parameter consistency for organs at risk in

- 298 nasopharyngeal carcinoma: A multi-institution clinical study. *Radiotherapy and Oncology*.  
299 2015;115(3):407-411. doi:10.1016/j.radonc.2015.05.012
- 300 6. Levendag P, Hoogeman M, Teguh D, et al. Atlas Based Auto-segmentation of CT Images:  
301 Clinical Evaluation of using Auto-contouring in High-dose, High-precision Radiotherapy of  
302 Cancer in the Head and Neck. *International Journal of Radiation Oncology\*Biology\*Physics*.  
303 2008;72(1). doi:10.1016/j.ijrobp.2008.06.1285
- 304 7. Fortunati V, Verhaart RF, Lijn FVD, et al. Tissue segmentation of head and neck CT images  
305 for treatment planning: A multiatlas approach combined with intensity modeling. *Medical*  
306 *Physics*. 2013;40(7):071905. doi:10.1118/1.4810971
- 307 8. Qazi AA, Pekar V, Kim J, Xie J, Breen SL, Jaffray DA. Auto-segmentation of normal and  
308 target structures in head and neck CT images: A feature-driven model-based approach.  
309 *Medical Physics*. 2011;38(11):6160-6170. doi:10.1118/1.3654160
- 310 9. Wang Z, Wei L, Wang L, Gao Y, Chen W, Shen D. Hierarchical Vertex Regression-Based  
311 Segmentation of Head and Neck CT Images for Radiotherapy Planning. *IEEE Transactions*  
312 *on Image Processing*. 2018;27(2):923-937. doi:10.1109/tip.2017.2768621
- 313 10. Fritscher KD, Peroni M, Zaffino P, Spadea MF, Schubert R, Sharp G. Automatic  
314 segmentation of head and neck CT images for radiotherapy treatment planning using multiple  
315 atlases, statistical appearance models, and geodesic active contours. *Medical Physics*.  
316 2014;41(5):051910. doi:10.1118/1.4871623
- 317 11. Zhu W, Huang Y, Zeng L, et al. AnatomyNet: Deep learning for fast and fully automated  
318 whole-volume segmentation of head and neck anatomy. *Medical Physics*. 2018;46(2):576-  
319 589. doi:10.1002/mp.13300

- 320 12. Ibragimov B, Xing L. Segmentation of organs-at-risks in head and neck CT images using  
321 convolutional neural networks. *Medical Physics*. 2017;44(2):547-557. doi:10.1002/mp.12045
- 322 13. Rooij WV, Dahele M, Brandao HR, Delaney AR, Slotman BJ, Verbakel WF. Deep Learning-  
323 Based Delineation of Head and Neck Organs at Risk: Geometric and Dosimetric Evaluation.  
324 *International Journal of Radiation Oncology\*Biography\*Physics*. 2019;104(3):677-684.  
325 doi:10.1016/j.ijrobp.2019.02.040
- 326 14. Ronneberger O, Fischer P, Brox T. U-Net: Convolutional Networks for Biomedical Image  
327 Segmentation. *Lecture Notes in Computer Science Medical Image Computing and*  
328 *Computer-Assisted Intervention – MICCAI 2015*. 2015:234-241. doi:10.1007/978-3-319-  
329 24574-4\_28
- 330 15. Men K, Chen X, Zhang Y, et al. Deep Deconvolutional Neural Network for Target  
331 Segmentation of Nasopharyngeal Cancer in Planning Computed Tomography Images.  
332 *Frontiers in Oncology*. 2017;7. doi:10.3389/fonc.2017.00315
- 333 16. Simonyan K, Zisserman A. Very Deep Convolutional Networks for Large-Scale Image  
334 Recognition. <https://arxiv.org/abs/1409.1556>.
- 335 17. Tong N, Gou S, Yang S, Ruan D, Sheng K. Fully automatic multi-organ segmentation for  
336 head and neck cancer radiotherapy using shape representation model constrained fully  
337 convolutional neural networks. *Medical Physics*. 2018;45(10):4558-4567.  
338 doi:10.1002/mp.13147
- 339 18. Gao Y, Huang R, Chen M, et al. FocusNet: Imbalanced Large and Small Organ  
340 Segmentation with an End-to-End Deep Neural Network for Head and Neck CT Images.  
341 *Lecture Notes in Computer Science Medical Image Computing and Computer Assisted*  
342 *Intervention – MICCAI 2019*. 2019:829-838. doi:10.1007/978-3-030-32248-9\_92

- 343 19. Chen L-C, Zhu Y, Papandreou G, Schroff F, Adam H. Encoder-Decoder with Atrous  
344 Separable Convolution for Semantic Image Segmentation. *Computer Vision – ECCV 2018*  
345 *Lecture Notes in Computer Science*. 2018:833-851. doi:10.1007/978-3-030-01234-2\_49
- 346 20. He K, Zhang X, Ren S, Sun J. Deep Residual Learning for Image Recognition. 2016 IEEE  
347 *Conference on Computer Vision and Pattern Recognition (CVPR)*. 2016.  
348 doi:10.1109/cvpr.2016.90
- 349 21. Zhang J. jfzhang95/pytorch-deeplab-xception. GitHub. [https://github.com/jfzhang95/pytorch-](https://github.com/jfzhang95/pytorch-deeplab-xception.git)  
350 [deeplab-xception.git](https://github.com/jfzhang95/pytorch-deeplab-xception.git).
- 351 22. Kingma D, Ba J. Adam: A Method for Stochastic Optimization. arXiv preprint.  
352 <https://arxiv.org/pdf/1412.6980>.
- 353 23. Deasy JO, Blanco AI, Clark VH. CERR: A computational environment for radiotherapy  
354 research. *Medical Physics*. 2003;30(5):979-985. doi:10.1118/1.1568978
- 355 24. Thomson D, Boylan C, Liptrot T, et al. Evaluation of an automatic segmentation algorithm  
356 for definition of head and neck organs at risk. *Radiation Oncology*. 2014;9(1):173.  
357 doi:10.1186/1748-717x-9-173.
- 358 25. Han X, Hoogeman MS, Levendag PC, et al. Atlas-Based Auto-segmentation of Head and  
359 Neck CT Images. *Medical Image Computing and Computer-Assisted Intervention – MICCAI*  
360 *2008*. 2008:434-441. doi:10.1007/978-3-540-85990-1\_52
- 361 26. Elguindi S, Zelefsky MJ, Jiang J, et al. Deep learning-based auto-segmentation of targets and  
362 organs-at-risk for magnetic resonance imaging only planning of prostate radiotherapy.  
363 *Physics and Imaging in Radiation Oncology*. 2019;12:80-86. doi:10.1016/j.phro.2019.11.006
- 364 27. Haq R, Hotca A, Apte A, Rimner A, Deasy JO, Thor M. Cardio-pulmonary substructure  
365 segmentation of radiotherapy computed tomography images using convolutional neural

- 366 networks for clinical outcomes analysis. *Physics and Imaging in Radiation Oncology*.
- 367 <https://www.sciencedirect.com/science/article/abs/pii/S2405631620300221>
- 368 28. Folk, M., Cheng, A., & Yates, K. (1999, November). HDF5: A file format and I/O library for  
369 high performance computing applications. In *Proceedings of supercomputing* (Vol. 99, pp. 5-  
370 33).
- 371 29. Tsai CJ, Jackson A, Setton J, et al. Modeling Dose Response for Late Dysphagia in Patients  
372 With Head and Neck Cancer in the Modern Era of Definitive Chemoradiation. *JCO Clinical*  
373 *Cancer Informatics*. 2017;(1):1-7. doi:10.1200/cci.17.00070
- 374 30. Rao SD, Saleh ZH, Setton J, et al. Dose-volume factors correlating with trismus following  
375 chemoradiation for head and neck cancer. *Acta Oncologica*. 2015;55(1):99-104.  
376 doi:10.3109/0284186x.2015.1037864
- 377 31. Apte AP, Iyer A, Thor M, et al. Library of deep-learning image segmentation and outcomes  
378 model-implementations. *Physica Medica*.  
379 <https://www.sciencedirect.com/science/article/pii/S1120179720300922>. Published May 1,  
380 2020. Accessed July 27, 2020.
- 381 32. Apte AP, Iyer A, Crispin-Ortuzar M, et al. Technical Note: Extension of CERR for  
382 computational radiomics: A comprehensive MATLAB platform for reproducible radiomics  
383 research. *Medical Physics*. 2018;45(8):3713-3720. doi:10.1002/mp.13046
- 384 33. Paszke, A.; Gross, S.; Massa, F.; Lerer, A.; Bradbury, J.; Chanan, G.; Killeen, T.; Lin, Z.;  
385 Gimelshein, N.; Antiga, L.; et al. PyTorch: An imperative style, high-performance deep  
386 learning library. In *Proceedings of the Advances in Neural Information Processing Systems*,  
387 Vancouver, BC, Canada, 8–14 December 2019; pp. 8024–8035.

- 388 34. Kurtzer GM, Sochat V, Bauer MW. Singularity: Scientific containers for mobility of  
389 compute. Plos One. 2017;12(5). doi:10.1371/journal.pone.0177459
- 390 35. Iyer A, Thor M, Haq R, Deasy JO, Apte AP. Deep learning-based auto-segmentation of  
391 swallowing and chewing structures in CT. bioRxiv.  
392 <https://www.biorxiv.org/content/10.1101/772178v1>. Published January 1, 2019. Accessed  
393 July 27, 2020.

394 **ACKNOWLEDGEMENTS**

395 This work was partially funded by NIH grant 1R01CA198121 and NIH/NCI Cancer Center  
396 Support grant P30 CA008748.
